# Supplementary material for: Modeling type 1 diabetes progression using machine learning and single-cell transcriptomic measurements in human islets
Source: PubMed Central journal article supplement — Cell Rep Med. 2024 Apr 26;5(5):101535. doi: 10.1016/j.xcrm.2024.101535 (PMC11148720; doi:10.1016/j.xcrm.2024.101535), 2024-04-26
Supplement: mmc2.pdf [file mmc2.pdf]

The tables below show the performance of our XGBoost classifier in different scenarios. The mean scores were computed based on one hundred iterations in each comparison.

**Table 1.** Performance metrics of XGBoost classifier across all cells (unannotated)

| <b>Comparison</b> | <b>Accuracy<br/>Mean (SD)</b> | <b>Sensitivity<br/>Mean (SD)</b> | <b>Specificity<br/>Mean (SD)</b> |
|-------------------|-------------------------------|----------------------------------|----------------------------------|
| T1D-CTL           | 99.10 (0.04)                  | 99.71 (0.04)                     | 96.94 (0.20)                     |
| T1D-AAb+          | 99.15 (0.07)                  | 99.40 (0.08)                     | 98.88 (0.12)                     |
| AAb+-CTL          | 96.34 (0.23)                  | 98.69 (0.13)                     | 88.44 (0.87)                     |

SD- Standard Deviation.

**Table 2.** Performance metrics of XGBoost T1D-CTL classifier across different cell types

| <b>Cell Types</b> | <b>Accuracy<br/>Mean (SD)</b> | <b>Sensitivity<br/>Mean (SD)</b> | <b>Specificity<br/>Mean (SD)</b> |
|-------------------|-------------------------------|----------------------------------|----------------------------------|
| Acinar            | 99.20 (0.10)                  | 99.69 (0.08)                     | 98.08 (0.25)                     |
| Alpha             | 99.13 (0.09)                  | 99.71 (0.06)                     | 96.93 (0.36)                     |
| Beta              | 99.60 (0.07)                  | 99.98 (0.02)                     | 85.31 (2.32)                     |
| Delta             | 98.08 (0.39)                  | 99.42 (0.27)                     | 92.08 (1.72)                     |
| Ductal            | 98.86 (0.17)                  | 99.71 (0.12)                     | 97.79 (0.37)                     |
| Immune            | 94.18 (1.21)                  | 97.67 (1.00)                     | 85.94 (3.48)                     |

SD- Standard Deviation.

**Table 3.** Performance metrics of XGBoost T1D-AAb+ classifier across different cell types

| <b>Cell Types</b> | <b>Accuracy<br/>Mean (SD)</b> | <b>Sensitivity<br/>Mean (SD)</b> | <b>Specificity<br/>Mean (SD)</b> |
|-------------------|-------------------------------|----------------------------------|----------------------------------|
| Acinar            | 99.32 (0.11)                  | 98.95 (0.25)                     | 99.53 (0.13)                     |
| Alpha             | 99.38 (0.11)                  | 99.67 (0.11)                     | 99.07 (0.21)                     |
| Beta              | 98.90 (0.21)                  | 99.80 (0.10)                     | 88.11 (2.37)                     |
| Delta             | 97.70 (0.71)                  | 98.31 (1.01)                     | 97.19 (1.15)                     |
| Ductal            | 99.25 (0.18)                  | 99.12 (1.32)                     | 99.34 (0.22)                     |
| Immune            | 91.97 (1.59)                  | 88.92 (3.06)                     | 94.29 (2.00)                     |

SD- Standard Deviation.

**Table 4.** Performance metrics of XGBoost AAb+-CTL classifier across different cell types

| <b>Cell Types</b> | <b>Accuracy<br/>Mean (SD)</b> | <b>Sensitivity<br/>Mean (SD)</b> | <b>Specificity<br/>Mean (SD)</b> |
|-------------------|-------------------------------|----------------------------------|----------------------------------|
| Acinar            | 97.75 (0.20)                  | 99.34 (0.22)                     | 91.59 (0.69)                     |
| Alpha             | 97.15 (0.17)                  | 99.19 (0.14)                     | 89.86 (0.73)                     |
| Beta              | 97.20 (0.18)                  | 98.79 (0.18)                     | 92.13 (0.55)                     |
| Delta             | 91.59 (0.86)                  | 98.76 (0.44)                     | 54.97 (4.32)                     |
| Ductal            | 97.03 (0.29)                  | 99.02 (0.33)                     | 93.00 (0.74)                     |
| Immune            | 81.23 (1.84)                  | 95.76 (1.86)                     | 36.48 (6.07)                     |

SD- Standard Deviation.
