# Supplementary material for: Modeling type 1 diabetes progression using machine learning and single-cell transcriptomic measurements in human islets
Source: PubMed Central journal article supplement — Cell Rep Med. 2024 Apr 26;5(5):101535. doi: 10.1016/j.xcrm.2024.101535 (PMC11148720; doi:10.1016/j.xcrm.2024.101535), 2024-04-26
Supplement: mmc3.pdf [file mmc3.pdf]

The tables below show the comparison of various machine learning models in T1D vs. CTL comparison across all cells (unannotated). The mean scores were computed based on one hundred iterations performed for XGBoost and ten iterations for support vector machines (SVM) and naïve Bayes.

**Table 1.** Comparison of machine learning models across all cells (unannotated) in T1D vs. CTL

| <b>Method</b> | <b>Accuracy<br/>Mean (SD)</b> | <b>Sensitivity<br/>Mean (SD)</b> | <b>Specificity<br/>Mean (SD)</b> |
|---------------|-------------------------------|----------------------------------|----------------------------------|
| XGBoost       | 99.10 (0.04)                  | 99.71 (0.04)                     | 96.94 (0.20)                     |
| SVM Linear    | 97.56 (0.06)                  | 98.51 (0.09)                     | 94.15 (0.27)                     |
| SVM Radial    | 97.03 (0.10)                  | 99.88 (0.12)                     | 86.82 (0.40)                     |
| Naïve Bayes   |                               |                                  |                                  |

SD- Standard Deviation.

The tables below show the comparison of various machine learning models in T1D vs. CTL comparison across cell types. The mean scores were computed based on one hundred iterations performed for XGBoost and ten iterations for SVM and naïve Bayes.

**Table 2.** Comparison of machine learning models across major cell types in T1D vs. CTL

| <b>Method</b> | <b>Cell Types</b> | <b>Accuracy<br/>Mean (SD)</b> | <b>Sensitivity<br/>Mean (SD)</b> | <b>Specificity<br/>Mean (SD)</b> |
|---------------|-------------------|-------------------------------|----------------------------------|----------------------------------|
| XGBoost       | Acinar            | 99.20 (0.10)                  | 99.69 (0.08)                     | 98.08 (0.25)                     |
| SVM Linear    | Acinar            | 98.42 (0.11)                  | 99.16 (0.07)                     | 96.70 (0.38)                     |
| SVM Radial    | Acinar            | 94.78 (0.18)                  | 99.78 (0.04)                     | 83.33 (0.64)                     |
| Naïve Bayes   | Acinar            | 76.54 (0.51)                  | 97.75 (0.33)                     | 27.92 (1.39)                     |
| XGBoost       | Alpha             | 99.13 (0.09)                  | 99.71 (0.06)                     | 96.93 (0.36)                     |
| SVM Linear    | Alpha             | 98.76 (0.11)                  | 99.51 (0.05)                     | 95.92 (0.48)                     |
| SVM Radial    | Alpha             | 97.41 (0.15)                  | 99.85 (0.04)                     | 88.08 (0.72)                     |
| Naïve Bayes   | Alpha             | 75.64 (1.28)                  | 77.77 (2.30)                     | 67.48 (2.98)                     |
| XGBoost       | Beta              | 99.60 (0.07)                  | 99.98 (0.02)                     | 85.31 (2.32)                     |
| SVM Linear    | Beta              | 99.69 (0.09)                  | 100.0 (0.01)                     | 88.16 (3.09)                     |
| SVM Radial    | Beta              | 98.67 (0.13)                  | 100.0 (0.00)                     | 48.32 (3.17)                     |

|             |        |              |               |              |
|-------------|--------|--------------|---------------|--------------|
| Naïve Bayes | Beta   | 2.56 (0.17)  | 0 (0.00)      | 100.0 (0.00) |
| XGBoost     | Delta  | 98.08 (0.39) | 99.42 (0.27)  | 92.08 (1.72) |
| SVM Linear  | Delta  | 97.83 (0.46) | 99.65 (0.16)  | 89.63 (1.93) |
| SVM Radial  | Delta  | 93.17 (0.62) | 99.94 (0.05)  | 62.63 (2.30) |
| Naïve Bayes | Delta  | 21.29 (2.39) | 4.09 (2.50)   | 99.04 (0.99) |
| XGBoost     | Ductal | 98.86 (0.17) | 99.71 (0.12)  | 97.79 (0.37) |
| SVM Linear  | Ductal | 98.80 (0.19) | 99.50 (0.09)  | 98.09 (0.41) |
| SVM Radial  | Ductal | 95.32 (0.47) | 99.34 (0.20)  | 90.19 (0.91) |
| Naïve Bayes | Ductal | 61.65 (0.64) | 99.65 (0.15)  | 13.00 (2.06) |
| XGBoost     | Immune | 94.18 (1.21) | 97.67 (1.00)  | 85.94 (3.48) |
| SVM Linear  | Immune | 93.13 (1.60) | 98.67 (0.57)  | 79.67 (5.03) |
| SVM Radial  | Immune | 72.89 (2.37) | 100.0 (0.00)  | 6.10 (3.84)  |
| Naïve Bayes | Immune | 39.26 (6.81) | 16.07 (12.53) | 95.87 (4.25) |

SD- Standard Deviation.
